1           **Twenty years of change in benthic communities across the Belizean Barrier Reef**

2

3   Catherine Alves<sup>1,2</sup>, Richard B. Aronson<sup>3</sup>, Nadia Bood<sup>4</sup>, Karl D. Castillo<sup>5</sup>, Courtney Cox<sup>6</sup>, Clare  
4   Fieseler<sup>7</sup>, Zachary Locklear<sup>8</sup>, Melanie McField<sup>9</sup>, Laura Mudge<sup>10</sup>, James Umbanhowar<sup>1,10</sup>, Abel  
5   Valdivia<sup>6</sup>, John F. Bruno<sup>10\*</sup>

6

7   <sup>1</sup> Environment, Ecology, and Energy Program, The University of North Carolina at Chapel Hill,  
8   Chapel Hill, North Carolina, United States of America 27599

9   <sup>2</sup> ECS Federal, Inc., Northeast Fisheries Science Center, Social Science Branch, National  
10   Oceanic and Atmospheric Administration, 28 Tarzwell Drive, Narragansett, RI, 02882

11   <sup>3</sup> Department of Ocean Engineering and Marine Sciences, Florida Institute of Technology, 150  
12   West University Boulevard, Melbourne, Florida, United States of America 32901

13   <sup>4</sup> World Wildlife Fund Mesoamerica, Belize Field Programme Office. 1154 Sunrise Ave, Belize  
14   City, Belize. Central America

15   <sup>5</sup> Department of Marine Sciences, The University of North Carolina at Chapel Hill, Chapel Hill,  
16   North Carolina, United States of America 27599

17   <sup>6</sup> Rare, 1310 N. Courthouse Road, Suite 110, Arlington, Virginia, United States of America  
18   22201

19   <sup>7</sup> Science, Technology, and International Affairs Program, Georgetown University, 37<sup>th</sup> and O  
20   Streets NW, Washington, District of Columbia, United States of America 20057

21   <sup>8</sup> Green Bay Wildlife Conservation Office, United States Fish and Wildlife Service, 2661 Scott  
22   Tower Drive, New Franken, Wisconsin, United States of America 54229

23 <sup>9</sup> Healthy Reefs for Healthy People Initiative, Smithsonian Institution, 701 Seaway Dr, Fort  
24 Pierce FL 34949

25 <sup>10</sup> Department of Biology, The University of North Carolina at Chapel Hill, Chapel Hill, North  
26 Carolina, United States of America 27599

27

28 \* **Corresponding author e-mail:** [jbruno@unc.edu](mailto:jbruno@unc.edu)

29

30 **Key Words:** Coral reefs, community ecology, Belize, Caribbean, marine protected areas

31 **Abstract**

32 Disease, ocean warming, and pollution have caused catastrophic declines in the cover of living  
33 coral on reefs across the Caribbean. Subsequently, reef-building corals have been replaced by  
34 invertebrates and macroalgae, leading to changes in ecological functioning. We describe changes  
35 in benthic community composition and cover at 15 sites across the Belizean Barrier Reef (BBR)  
36 following numerous major disturbances—bleaching, storms, and disease outbreaks—over the  
37 20-year period 1997–2016. We tested the role of potential drivers of change on coral reefs,  
38 including local human impacts and ocean temperature. From 1997 to 2016, mean coral cover  
39 significantly declined from 26.3% to 10.7%, while macroalgal cover significantly increased from  
40 12.9% to 39.7%. We documented a significant decline over time of the reef-building corals  
41 *Orbicella* spp. and described a major shift in benthic composition between early sampling years  
42 (1997–2005) and later years (2009–2016). The covers of hard-coral taxa, including *Acropora*  
43 spp., *M. cavernosa*, *Orbicella* spp., and *Porites* spp., were negatively related to marine heatwave  
44 frequency. Only gorgonian cover was related, negatively, to our metric of the magnitude of local  
45 impacts (the Human Influence Index). Changes in benthic composition and cover were not  
46 associated with local protection or fishing. This result is concordant with studies throughout the  
47 Caribbean that have documented living coral decline and shifts in reef-community composition  
48 following disturbances, regardless of local fisheries restrictions. Our results suggest that benthic  
49 communities along the BBR have experienced disturbances that are beyond the capacity of the  
50 current management structure to mitigate. We recommend that managers devote greater  
51 resources and capacity to enforce and expand existing marine protected areas and that  
52 government, industry, and the public act to reduce global carbon emissions.

53

## 54 INTRODUCTION

55 Coral reefs worldwide have experienced remarkable changes over the past 50 years, particularly  
56 the widespread declines of reef-building corals and large, predatory fishes (1–7). These changes  
57 have caused a reduction in or effective loss of essential ecological functions, including the  
58 provisioning of habitat for fisheries production and the maintenance of reef structure for  
59 shoreline protection (8,9). Given the substantial economic and cultural value of healthy reefs  
60 (10), this degradation is affecting coastal human communities that depend on reefs for food,  
61 income, and protection from storms.

62

63 Numerous factors are responsible for the well-documented degradation of Caribbean reefs.  
64 Acroporid corals, which dominated Caribbean reefs for millions of years, experienced 90–95%  
65 mortality due to white-band disease in the 1980s (11). This disease, likely exacerbated by ocean  
66 warming (12), coupled with increased frequency and intensity of hurricanes (13–15), reduced the  
67 habitat complexity, or rugosity, of Caribbean reefs (16). Several other disease syndromes have  
68 greatly reduced the cover of other coral taxa, including black-band disease, which primarily  
69 affects brain corals (17), yellow-band disease, which primarily affects *Orbicella* spp. (18), and,  
70 more recently, stony coral tissue loss disease, which affects numerous species, including  
71 *Dendrogyra cylindrus*, *Pseudodiploria strigosa*, *Meandrina meandrites*, *Eusmilia fastigiata*,  
72 *Siderastrea siderea* and *Diploria labyrinthiformis* (19). Coral bleaching and other manifestations  
73 of ocean warming, including increased disease severity, are primary causes of coral loss in the  
74 Caribbean (20–27). On local scales, increased sedimentation from coastal development affects  
75 coral reefs by increasing turbidity and smothering corals (28,29). Secondary drivers include  
76 factors that have increased the cover of fleshy macroalgae (seaweeds), including the death of

77 scleractinian corals and the consequent opening of space and other resources (30), nutrient  
78 loading, and the loss of herbivores, particularly the sea urchin *Diadema antillarum* due to a  
79 regional disease outbreak (31), and herbivorous fishes due to fishing (32–37).

80

81 Despite the clear and well-documented changes to Caribbean reefs, there is ongoing  
82 disagreement about the causes of and best remedies for reef decline (20,38–41). The crux of the  
83 debate is about the relative importance of local causes—pollution, eutrophication, fishing, and  
84 consequent seaweed blooms—compared with regional-to-global causes such as ocean warming  
85 and acidification. Scientists, agencies, and organizations that view localized drivers as  
86 predominant generally argue for local mitigation, the primary recommendation being fisheries  
87 restrictions, such as within Marine Protected Areas (MPAs) (34,42–44). In contrast, the view that  
88 anthropogenic climate change has been a significant or predominant cause of reef decline leads  
89 to the conclusion that without rapid cuts in carbon emissions, local protections and other  
90 localized management actions, such as restoration, will ultimately fail (20,39,45).

91

92 The purpose of this study was to measure changes to benthic communities of the Belizean  
93 Barrier Reef (BBR) from 1997 to 2016 and to determine whether they were related to protection  
94 status, fishing, local human impacts, and ocean-temperatures anomalies (i.e., ocean heatwaves).  
95 We performed surveys of the coral reef benthos at 15 sites between 1997 and 2016 (46–48). We  
96 found that benthic-community composition changed substantially during this period, and that the  
97 observed loss of corals was negatively related to ocean heatwaves and largely unaffected by local  
98 impacts, fishing or protection status.

99

## 100 MATERIALS AND METHODS

### 101 Study area

102 Scientists have tracked reef community composition across Belize for over 50 years, mostly in  
103 short-term, longitudinal studies (e.g., 11,46,48–50). Belize has an extensive, 30-plus-year-old  
104 MPA network (46) and a history of frequent large-scale disturbances (Table 1). We surveyed  
105 fore-reef benthic communities at 15–18 m depth at 15 sites along the BBR during the summer  
106 months in 1997, 1999, 2005, 2009, and 2016 (Figure 1; Table S1). Due to logistical and resource  
107 constraints, only three of the 15 sites were surveyed every year: Bacalar Chico, Middle Caye,  
108 and Tacklebox (Table S1). Study sites were selected to maximize spatial heterogeneity and  
109 include a range of protections or management zones (5,47). These management protections  
110 included five sites within fully protected (FP) zones (otherwise known as “marine reserves”),  
111 where only non-extractive activities are permitted, three sites within general-use (GU) zones,  
112 where fishing is permitted with some gear restrictions (e.g., prohibitions on longlines, gillnets,  
113 and the use of spearguns and slings with SCUBA) and modest fishing limits (e.g., catch-size  
114 limits for queen conch and lobster), and seven sites in unprotected (NP) zones, where fishing is  
115 not restricted (46). Note that national seasonal closures for some species (e.g., Nassau grouper)  
116 and bans (e.g., on catching parrotfishes) applied to all three zones.

117

### 118 Benthic surveys

119 Benthic surveys were conducted *in situ* using SCUBA. At each site, dive teams laid out four to  
120 ten, 25-30 m x 2 m belt transects down the centers of reef spurs, perpendicular to the shoreline.  
121 The transects generally began on or near the shoulders of the spurs at 15–18 m depth, shoreward  
122 of the drop-off that characterizes most of the reefs, and ran upward toward the reef crest.

123 Transects were parallel to each other and were usually separated by > 10 m. Divers worked in  
124 buddy pairs, in which one diver laid out the transect tape and the other used a digital camera in  
125 an underwater housing to obtain videos and still-frame images of the benthos. At each site, we  
126 photographed or videotaped the belt transects at a standard distance of 25 cm above the benthos  
127 using a horizontal bar projected from the front of the camera housing. In all sampling years  
128 except 2016, we obtained underwater videos along the belt transects and extracted still frames  
129 from those videos (as outlined below). In 2016, we photographed the transects using a GoPro  
130 HERO4 by swimming at a rate of 5–7 minutes along the 30-m-long transect and taking a  
131 photograph every five seconds.

132

### 133 **Image extraction and analysis**

134 Because of changes in imaging technology and analytical software over the course of this study  
135 we used several techniques to extract and analyze the benthic images from the underwater  
136 transects. For sampling year 1997, we recorded Hi-8 video of each transect, using two 30-watt  
137 ultrabright lights for illumination; in 1999 and 2005, we used Sony 3chip mini DVR without  
138 illumination. From these video cassettes we randomly selected 50 frames per transect, processed  
139 the images by de-interlacing, sharpening, and enhancing them, and saved them onto a CD-ROM.  
140 In 2009, we switched to digital video. We extracted the images from the video at a rate of 1-fps  
141 using Adobe Premiere Pro CC 2014. We ran the images through the Automator program in OS-  
142 X software to select every third, fifth or seventh image, depending on the length (in time) of the  
143 transect. We analyzed 15 images/transect/site for 2009 and 2016 because we found that we could  
144 obtain a similar level of inference about community composition with 15 images per transect as  
145 with the 50 images per transect suggested by Aronson et al. (51). To select the images, we

146 automated the process using a code in R version 3.6.3 [1] to randomly choose, copy, and paste  
147 15 images into a new folder from our source-folder of all images.  
148  
149 We analyzed the benthic cover of images from 1997–2005 using Coral Point Count software  
150 (52), and from 2009 and 2016 using CoralNet (53). We manually input species-level benthic  
151 identifications for each of 10 random points overlaid onto each image (51). When species-level  
152 identifications were not possible, benthic components were identified to genus or family. All  
153 benthic components identified were pooled into five benthic categories: (1) crustose–turf–bare  
154 space (abbreviated CTB), which represents substrate that is bare, dead, covered in turf algae,  
155 and/or crustose coralline algae (48,54), (2) hard corals (which includes all scleractinian corals  
156 and milleporine fire corals), (3) macroalgae, including algae in the genus *Halimeda*, (4)  
157 gorgonians, and (5) sponges. The corals *Orbicella annularis*, *O. favelota*, and *O. franksii* were  
158 pooled as *Orbicella* spp. because the species complex was not divided into three distinct species  
159 during the 1997 and 1999 data collection and because they were difficult to distinguish in some  
160 video frames. In all instances, image-level point-count data were converted to percent-cover  
161 estimates, and we calculated overall mean percent covers of each category for each site and year.  
162

### 163 **Putative drivers of benthic community dynamics**

164 We estimated local human impacts using the Global Human Influence Index (HII, version 2)  
165 from NASA’s Socioeconomic Data and Applications Center (SEDAC) database (55). The HII is  
166 a global dataset of 1-km grid cells aggregated from 1995–2004 designed to estimate location-  
167 specific human influence and thus potential impacts to natural populations and ecosystems via  
168 local direct and indirect human activities (e.g., harvesting and pollution). It is based on nine



169 global data layers including human population density, land use, and access (which is estimated  
170 from coastlines, roads, railroads and navigable rivers). These aspects of human communities are  
171 known to be predictive of local human impacts in many natural systems including coral reefs  
172 (6,7,28,56–59). We extracted HII values for the BBR (Fig. S1) and calculated the sum of the HII  
173 scores of grid cells within a 50-km, 75-km, and 100-km buffer from the center-coordinates of  
174 each study site (Table S1). We used HII scores within the 50-km buffer for the final analysis  
175 because this metric performed well in exploratory models and it has been used successfully in  
176 prior work (5, 56). We then tested whether this index of local human impacts was related to  
177 observed changes on the monitored benthic reef communities.

178

179 Our measure of ocean-heatwave events was the site-specific frequency of Thermal Stress  
180 Anomalies (TSA Freq), obtained from the Coral Reef Temperature Anomaly Database  
181 (CoRTAD, Version 6) (60,61) (Fig. S2, Table S2). We used this metric to test for effects of  
182 thermal stress on the measured benthic groups. TSA Freq is defined as the number of deviations  
183 of 1 °C or greater from maximum weekly climatological sea-surface temperature during the 52  
184 weeks preceding a reef survey. Other studies have found that TSA Freq is a significant predictor  
185 of coral-cover loss and coral-disease prevalence (62–64). The CoRTAD is based on 4-km-  
186 resolution weekly measurements made by the Advanced Very High-Resolution Radiometer  
187 (AVHRR) sensor (Pathfinder 5.0 and 5.2) beginning in 1982. Daytime and nighttime data were  
188 averaged weekly using data with a quality flag of 4 or better.

189

190 **Data analyses**

191 To analyze changes in benthic composition and test for the effects of potential drivers of change,  
192 we built generalized linear mixed models (GLMM) in a Bayesian setting using the *blme* package  
193 (65). The response variables were the logit-transformed percent covers of key benthic categories.  
194 The final models had Year, Fishing level (“fishing”, which were the sites within FP zones, and  
195 “no fishing” which included GU and NP sites), HII at the 50-km buffer, and TSA Freq as fixed  
196 effects; and Site as a random effect. A *blme* prior with a *wishart* distribution was imposed over  
197 the covariance of the random effect and modeled coefficients. All predictor variables were  
198 additive, and the REML estimation was used to fit the data as it provides unbiased estimates for  
199 the variance components. Prior to fitting models, we rescaled and centered all numerical fixed  
200 effects to optimize comparisons among variables. The final model structure for each benthic  
201 category was as follows:

$$\begin{aligned} 202 \quad & \text{Logit (benthic cover)}_i = \\ 203 \quad & \alpha + \beta_{1j} * \text{Year}_{ij} + \beta_{2j} * \text{Fishing Level}_{ij} + \beta_{3j} * \text{HII}_{ij} + \beta_{4j} * \text{TSA Freq}_{ij} + \\ 204 \quad & \alpha_i + e_{ij} \end{aligned}$$

205  
206 where  $\alpha$  = intercept,  $\alpha_i$  = random intercept (Site),  $e_{ij}$  = error term, and  $\beta_{1j} - \beta_{4j}$  are the coefficient  
207 estimates for covariates. The logit-transformed coral cover was modeled as an intercept ( $\alpha$ ), plus  
208 linear effects of Year, Fishing level, HII at 50km, and TSA Freq; a random intercept ( $\alpha_i$ ) for Site,  
209 which is assumed to be normally distributed with a mean of 0 and variance  $\sigma\alpha^2$ ; and an error ( $e_{ij}$ ).  
210 The index  $i$  refers to sites ( $i = 1, \dots, 15$ ), and  $j$  refers to the year of survey ( $j = 1997, \dots, 2016$ ).  
211 The term  $e_{ij}$  was the within-site variance of benthic group cover and is assumed to be normally  
212 distributed with mean of 0 and a variance of  $\sigma^2$ .

213

214 We evaluated collinearity among fixed factors by assessing variance-inflation factors and chose a  
215 threshold of 3 to determine correlated variables. We tested for homoscedasticity (equal variances  
216 across predictor variables) by plotting residuals against fitted values. Comparing fitted and  
217 residual values suggested that our models were reasonable models of the means. We also  
218 examined the marginal and conditional R-squared values of the models.

219

220 To examine changes in community composition of all benthic taxa within sites and across years,  
221 we constructed a non-metric multidimensional scaling (NMDS) ordination using the *vegan*  
222 package in R. We used the Bray–Curtis dissimilarity index to calculate distances among taxon-  
223 level cover data because it handles the large numbers of zeros (which denote absences)  
224 commonly found in ecological data and does not consider shared absences as being similar (66).  
225 To determine the effects of covariates (Year, TSA Freq, HII\_50km, and Fishing level) on  
226 community composition changes of benthic taxa we ran a Permutational Multivariate Analysis of  
227 Variance (PERMANOVA) using the Bray-Curtis dissimilarity index to calculate distance  
228 matrices. All statistical analyses were performed in R version 3.6.3. The code and processed data  
229 are available at <https://github.com/calves06/BRC>.

230

## 231 **RESULTS**

232 Among the five benthic groups of interest—hard corals, macroalgae, CTB, gorgonians, and  
233 sponges—we identified a significant decline in hard coral and CTB cover, significant increases  
234 in macroalgal and gorgonian cover, and no change in sponge cover (Figs. 2 & S3, Table 2).  
235 Fishing status (fished *versus* unfished) was not predictive of observed spatiotemporal variation in  
236 hard-coral, macroalgal, CTB, or sponge cover (Figs. 2 & 3, Table 2) and was marginally and

237 negatively related to gorgonian cover. The Human Influence Index (HII) was also unrelated to  
238 hard-coral, macroalgal CTB, or sponge cover (Fig. 3, Table 2). HII was significantly and  
239 negatively related to gorgonian cover. TSA Freq, our metric of ocean-heatwave frequency, was  
240 significantly negatively related to the cover of hard corals and gorgonians, and unrelated to the  
241 cover of macroalgae, CTB, and sponges (Fig. 3).

242

243 Throughout the two decades of this study, the substantial decline in hard-coral cover across the  
244 Belizean Barrier Reef from 26.3 % ( $\pm$  7.3 SD) to 10.6 % ( $\pm$  3.5 SD) (Fig. 2) was driven by a  
245 handful of reef-building coral species (Fig. 5). Notably, there was a significant decline of  
246 *Orbicella* spp., with mean cover falling from 12.7 % ( $\pm$  7.4 SD) in 1997 to 2.2 % ( $\pm$  0.9 SD) in  
247 2016 (Fig. 5, Table S4; model estimate = - 0.719,  $p$  < 0.001). This decline was predominantly  
248 observed from 1997 to 1999, which included a major bleaching event and Hurricane Mitch (Fig.  
249 5, Table 1), and from 2005 to 2009, which included a second bleaching event, Hurricane Dean,  
250 and an earthquake (Fig. 5, Table 1). The cover of hard-coral taxa such as *Acropora* spp.,  
251 *Colpophyllia natans*, and the combined cover of “other coral” taxa (e.g., *Mycetophyllia* spp.,  
252 *Madracis* spp., *Favia* spp. see Table S5 for a complete list) also declined significantly from 1997  
253 to 2016 (Fig. 5, Table S4). The cover of the coral taxa *Agaricia agaricities*,  
254 *Diploria/Pseudodiploria* spp., *Montastrea cavernosa*, *Siderastrea* spp., *Porites astreoides*, and  
255 *Porites* spp. (*P. porites*, *P. furcata*, and *P. divericata*) remained relatively low and did not  
256 change significantly during the study period (Fig. 5, Table S4). The cover of *Agaricia tenuifolia*  
257 slightly but significantly increased (Fig. 5, Table S4). Fishing level and HII were not significant  
258 predictors of spatial and temporal changes of any coral taxa (Table S4), except for *P. astreoides*,  
259 for which sites with higher cover were associated with areas of higher HII (Table S4). The cover

260 of *Acropora* spp., *M. cavernosa*, *Orbicella* spp. *Porites* spp., and “other coral” taxa were  
261 negatively correlated with TSA frequency (Table S4).

262

263 Based on the ordination analysis, there were major compositional shifts in the dominant benthic  
264 assemblages during 1997–2005 (left) and 2009–2016 (right) at every site (Fig. 6, Table 3),  
265 supporting the results of our models. The PERMANOVA showed that, among all covariates,  
266 time explained about 50% of the variability in benthic community changes ( $F = 45.8$ ,  $p < 0.001$ )  
267 and was the only significant predictor of change in overall community composition (Fig. 6, Table  
268 3). Fishing level, HII, and TSA frequency combined only accounted for 6% of community  
269 differences and were not good predictors of overall change of all taxa studied (Table 3). In 1997–  
270 2005, the benthic communities of the BBR were dominated by CTB and long-lived, massive  
271 reef-building corals such as *Orbicella* spp. and *C. natans*. During 2009–2016, composition had  
272 shifted to domination by small and/or weedy hard-coral species, macroalgae, and gorgonians  
273 (Fig. 6).

274

## 275 **DISCUSSION**

276 Belize’s network of protected areas, designed and implemented in part to prevent the degradation  
277 of benthic reef assemblages on the BBR, has not achieved this goal. Our results complement  
278 previous findings for Belize reporting the failure of individual MPAs or the network overall to  
279 protect and restore populations of overharvested reef fishes (5,46,67,68), but see (68). We  
280 documented a statistically and ecologically significant decline in hard-coral cover, an increase in  
281 macroalgae and gorgonians, and a substantial decline of CTB, regardless of protection status

282 (Fig. 2). Similar coral declines in isolated, well-protected, and seemingly “pristine” locations  
283 have been documented at many other sites globally (69,70).

284

285 We found that the benthic assemblages changed over time and were ecologically distinct  
286 between the earlier and later sampling intervals (1997–2005 and 2009–2016) (Fig. 6). For  
287 instance, the hard corals *Acropora* spp. and *Orbicella* spp. were more often present and more  
288 dominant (both had higher relative and absolute cover) in the early sampling years, as opposed to  
289 fleshy macroalgae and gorgonians, which dominated during later sampling years. In contrast, the  
290 cover of ‘weedy’ coral taxa such as *Porites* spp. and *Agaricia* spp. remained relatively consistent  
291 throughout the course of the study (Fig 5). The striking decline in *Orbicella* spp. (Fig. 5) was  
292 likely due to mortality from coral bleaching in 1998 (54,71) and 2005 (21,72–74), Hurricane  
293 Mitch in 1998, Hurricane Dean in 2007, and yellow-band disease in the early 2000s (Table 1).

294

295 Our results are concordant with previous studies in Belize that documented shifts in hard-coral  
296 and macroalgal cover (75). For example, the patch reefs of Glovers Reef atoll had ~0% hard  
297 coral and 20% fleshy-macroalgal cover in 1970–1971 but phase-shifted to 20% hard coral and  
298 80% macroalgal cover by 1996–1997 (75). This change was due to massive declines in the reef-  
299 building corals *Acropora cervicornis*, *A. palmata*, and *Orbicella* spp., and large increases in the  
300 cover and biomass of fleshy and corticated seaweeds including *Lobophora*, *Dictyota*, *Turbinaria*,  
301 and *Sargassum*. Prior to the beginning of our study, acroporid abundance had already declined  
302 across much of the BBR due to both hurricanes and white-band disease (11,68,76). Most  
303 remaining *A. cervicornis* and *A. palmata* was killed by high ocean temperatures during the 1998  
304 mass-bleaching event (54,71). A longitudinal study of *A. palmata* along the Mexican portion of

305 the Mesoamerican Barrier Reef also reported declines in acroporids, with *A. palmata* decreasing  
306 from 7.7% in 1985 to 2.9% in 2012 (76).

307

308 We attribute changes in the benthic assemblages of coral reefs along the BBR primarily to the  
309 large-scale disturbances to the system over the last several decades, including seven hurricanes  
310 and two mass-bleaching events caused by anthropogenic climate change (Table 1). We measured  
311 the potential effects of several putative drivers, including local human impacts estimated using  
312 the Human Influence Index (HII) and the frequency of ocean heatwaves (TSA Freq). Our results  
313 indicate that the local impacts had no measurable effect on hard-coral cover. HII was, however,  
314 significantly and negatively related to changes in gorgonians and positively associated with the  
315 cover of *Porites astreoides*. There is abundant evidence that local impacts, including pollution,  
316 fishing, and coastal land-use practices, can severely impact coral populations (28). Yet even  
317 when these stressors are clearly present, they are often overwhelmed by the effects of large-scale  
318 disturbances including ocean heatwaves and storms (20,39,57,75).

319

320 Shifts in the dominant benthic assemblages have been documented across the Caribbean, linked  
321 to regional disturbances such as herbivore declines, coral diseases, and mass-bleaching events  
322 (2,3,69,77,78). Across seven subregions in the Caribbean, Schutte et al. (2) found significant  
323 declines in hard-coral cover and increases in macroalgal cover from 1970–2005. Corals failed to  
324 recover in the Florida Keys (79) and the U.S. Virgin Islands (80) due to subsequent, repeated  
325 disturbances. The coral reefs of Bonaire exhibited similar trends over 15 years of bleaching,  
326 storms, and diseases, with a 22% decline in coral cover and an 18% increase in macroalgal cover  
327 by 2017 (81). These trends were also apparent in our study.

328

329 The primary management response to reef degradation has been implementation of MPAs  
330 (34,41,44,82). MPAs and MPA networks are areas where extractive activities are regulated via  
331 fishing closures or gear restrictions among others. Within well-designed and enforced MPAs,  
332 fish abundance and diversity often increase and in some cases spill over into adjacent, non-  
333 protected areas (68,83–86). Some MPAs also reduce other extractive activities that could directly  
334 or indirectly impact coral populations. However, a large majority of studies have found that  
335 MPAs are not slowing or preventing the decline of reef-building corals (50,63,67,79,87–89). A  
336 recent meta-analysis of 18 studies, encompassing 66 MPAs, reported that MPAs did not affect  
337 coral loss or recovery in response to large-scale disturbances including disease, bleaching, and  
338 storms (39). Our results for the BBR agree with this broad consensus.

339

340 Unlike local human impacts, anthropogenic climate change was clearly a significant driver of the  
341 dramatic shifts in community composition that occurred on the BBR over the two-decade study.  
342 Overall coral cover, and the cover of four coral taxa—*Acropora* spp., *Orbicella* spp., *Montastrea*  
343 *cavernosa*, and *Porites* spp.—were negatively related to heatwave frequency (Figs. 3 and 4).  
344 This result is in agreement with other studies that have documented coral mortality and  
345 consequent declines in coral cover following the temperature-induced mass-bleaching events on  
346 the BBR in 1998 and 2005 (48,54). Many other studies have documented the role of ocean  
347 heatwaves in coral decline around the world (21,22,63,69,88–93).

348

349 Our data show a substantial shift in the state of coral reefs along the Belizean Barrier Reef over a  
350 two-decade period rife with large-scale disturbances. The results illustrate the shortcoming of



351 protected areas in mitigating these impacts. We documented declines in the key reef-building  
352 coral genera *Acropora* and *Orbicella*, subsequent increases in macroalgal and gorgonian cover,  
353 and an overall change in the benthic assemblages over the two-decade study. Ocean-heatwave  
354 frequency was the only significant predictor of coral population declines over time. Our results  
355 provide insight into the overriding influence of regional, and global drivers at a time of rapid  
356 climate change, which will help managers improve their decision-making.

357

358

359

360 **Acknowledgements:** We thank the many volunteers who assisted with data collection, logistical  
361 support and image analysis over the years. We are extremely grateful for our partnerships with  
362 staff from the Belize Fisheries Department, Belize Coastal Zone Management Project, Wildlife  
363 Conservation Society, Marine Research Center at the University of California–Berkeley, Belize  
364 Audubon Society, Pelican Beach Resort, Rum Point Inn, Sea Sports Belize, Healthy Reefs for  
365 Healthy People, Bacalar Chico National Park and Marine Reserve, Hol Chan Marine Reserve,  
366 The Nature Conservancy, Southern Environmental Association, Toledo Institute for  
367 Development and Environment and the Smithsonian Institution.

368

369 **Competing interests:** The authors have declared that no competing interests exist.

370

371 **Data Availability:** All relevant code and data are available at here:

372 [https://github.com/calves06/Belizean\\_Barrier\\_Reef\\_Change](https://github.com/calves06/Belizean_Barrier_Reef_Change)

373

374

375 **Permitting:** The research was performed under permits from the Belize Fisheries Department to  
376 MM, NB, KC, CF, CC, and JFB including permit numbers 000018-09 and 000028-11.

377

378 **Funding:** This manuscript is based upon work supported by the National Science Foundation  
379 (DGE-1650116 to CA, OCE-0940019 to JFB, and partial support from OCE-1535007 to RBA),  
380 the Rufford Small Grant Foundation, the National Geographic Society, the International Society  
381 for Reef Studies/Center for Marine Conservation Reef Ecosystem Science Fellowship, the Elsie  
382 and William Knight, Jr. Fellowship from the Department of Marine Science at the University of  
383 South Florida, the J. William Fulbright program, the Organization of American States  
384 Fellowship, the World Wildlife Fund-Education for Nature Program, the Kuzimer-Lee-Nikitine  
385 Endowment Fund, the Nicholas School International Internship Fund at Duke University, the  
386 Lazar Foundation, and the Environment, Ecology and Energy Program, the Department of  
387 Biology, and the Chancellor's Science Scholar Research Fund at the University of North  
388 Carolina at Chapel Hill. This is contribution no. XXX from the Institute for Global Ecology at  
389 the Florida Institute of Technology. Any opinions, findings, and conclusions or  
390 recommendations expressed in this material are those of the authors and do not necessarily  
391 reflect the views of the funders.

392

393 **Author contributions:**

394 MM, RBA, NB, CF, and JFB designed the study

395 MM, RBA, NB, CC, CF, and JFB obtained the study funding

396 MM, NB, KC, CC, CF, CA, LM, AV, and JFB performed the surveys

397 MM, NB, CF, CC, and JFB performed the pre-survey expedition planning

398 CA, MM, NB, CF, CC, and AV organized the study data

399 MM, NB, CF, CA, ZL, LM, and JFB analyzed the benthic videos and images

400 CA, JU, AV, and JFB analyzed the data

401 CA, RA, AV, and JFB wrote the manuscript with contributions from the other authors

402

403 **LITERATURE CITED**

- 404 1. Bruno JF, Selig ER. Regional decline of coral cover in the Indo-Pacific: timing, extent, and  
405 subregional comparisons. *PLoS One*. 2007;e711.
- 406 2. Schutte VGW, Selig ER, Bruno JF. Regional spatio-temporal trends in Caribbean coral reef  
407 benthic communities. *Marine Ecology Progress Series*. 2010;402:115–22.
- 408 3. Gardner TA, Côté IM, Gill JA, Grant A, Watkinson AR. Long-term region-wide declines in  
409 Caribbean corals. *Science*. 2003;301:958–60.
- 410 4. De’ath G, Fabricius KE, Sweatman H, Puotinen M. From the Cover: The 27-year decline of  
411 coral cover on the Great Barrier Reef and its causes. *Proceedings of the National Academy  
412 of Sciences*. 2012 Oct 1;109(44):17995–9.
- 413 5. Valdivia A, Cox CE, Bruno JF. Predatory fish depletion and recovery potential on  
414 Caribbean reefs. *Sci Adv*. 2017 Mar;3(3):e1601303.
- 415 6. Stallings CD. Fishery-independent data reveal negative effect of human population density  
416 on Caribbean predatory fish communities. *PLoS ONE*. 2009;4:e5333.
- 417 7. Ward-Paige CA, Mora C, Lotze HK, Pattengill-Semmens C, McClenachan L, Arias-Castro  
418 E, et al. Large-scale absence of sharks on reefs in the Greater-Caribbean: a footprint of  
419 human pressures. *PLoS ONE*. 2010;5:e11968.
- 420 8. Kuffner IB, Toth LT. A geological perspective on the degradation and conservation of  
421 western Atlantic coral reefs. *Conservation Biology*. 2016 Aug;30(4):706–15.
- 422 9. Perry CT, Murphy GN, Kench PS, Smithers SG, Edinger EN, Steneck RS, et al. Caribbean-  
423 wide decline in carbonate production threatens coral reef growth. *Nat Commun*. 2013  
424 Jun;4(1):1402.
- 425 10. Spalding M, Burke L, Wood SA, Ashpole J, Hutchison J, zu Ermgassen P. Mapping the  
426 global value and distribution of coral reef tourism. *Marine Policy*. 2017 Aug;82:104–13.
- 427 11. Aronson RB, Precht WF. White-band disease and the changing face of Caribbean coral  
428 reefs. *Hydrobiologia*. 2001;460:25–38.
- 429 12. Randall CJ, van Woesik R. Contemporary white-band disease in the Caribbean has been  
430 driven by climate change. *Nature Climate Change*. 2015;5:375–9.
- 431 13. Webster PJ, Holland GJ, Curry JA, Chang HR. Atmospheric science: Changes in tropical  
432 cyclone number, duration, and intensity in a warming environment. *Science*.  
433 2005;309(5742):1844–6.
- 434 14. Emanuel KA. Downscaling CMIP5 climate models shows increased tropical cyclone  
435 activity over the 21st century. *Proceedings of the National Academy of Sciences of the  
436 United States of America*. 2013;110(30):12219–24.

- 437 15. Elsner JB, Kossin JP, Jagger TH. The increasing intensity of the strongest tropical cyclones.  
438 Nature. 2008;455:92–5.
- 439 16. Alvarez-Filip L, Dulvy NK, Gill JA, Côté IM, Watkinson AR. Flattening of Caribbean  
440 coral reefs: region-wide declines in architectural complexity. Proceedings of the Royal  
441 Society B: Biological Sciences. 2009;276(1669):3019–25.
- 442 17. Edmunds PJ. Extent and effect of Black Band Disease on a Caribbean reef. Coral Reefs.  
443 1991;
- 444 18. Bruckner AW, Bruckner RJ. Consequences of yellow band disease (YBD) on *Montastraea*  
445 *annularis* (species complex) populations on remote reefs off Mona Island, Puerto Rico.  
446 Diseases Aquatic Organisms. 2006;Special Issue 69:67–73.
- 447 19. Alvarez-Filip L, Estrada-Saldívar N, Pérez-Cervantes E, Molina-Hernández A, González-  
448 Barrios FJ. A rapid spread of the stony coral tissue loss disease outbreak in the Mexican  
449 Caribbean. PeerJ. 2019 Nov 26;7:e8069.
- 450 20. Aronson RB, Precht WF. Conservation, precaution, and Caribbean reefs. Coral Reefs.  
451 2006;25:441–50.
- 452 21. Eakin CM, Morgan JA, Heron SF, Smith TB, Liu G, Alvarez-Filip L, et al. Caribbean  
453 corals in crisis: Record thermal stress, bleaching, and mortality in 2005. PLoS ONE.  
454 2010;5(11).
- 455 22. Baker AC, Glynn PW, Riegl B. Climate change and coral reef bleaching: An ecological  
456 assessment of long-term impacts, recovery trends and future outlook. Estuarine, Coastal and  
457 Shelf Science. 2008 Dec;80(4):435–71.
- 458 23. Williams EH, Bunkley-Williams L. The world-wide coral reef bleaching cycle and related  
459 sources of coral mortality. Atoll Research Bulletin. 1990;335:1–71.
- 460 24. Manzello DP. Rapid Recent Warming of Coral Reefs in the Florida Keys. Sci Rep. 2015  
461 Dec;5(1):16762.
- 462 25. Alemu I JB, Clement Y. Mass Coral Bleaching in 2010 in the Southern Caribbean. Dias  
463 JM, editor. PLoS ONE. 2014 Jan 6;9(1):e83829.
- 464 26. Winter A, Appeldoorn RS, Bruckner A, Williams EHJr, Goenaga C. Sea surface  
465 temperatures and coral reef bleaching off La Parguera, Puerto Rico (northeastern Caribbean  
466 Sea). Coral Reefs. 1998;17:377–82.
- 467 27. McWilliams JP, Côté IM, Gill JA, Sutherland WJ, Watkinson AR. Accelerating impacts of  
468 temperature-induced coral bleaching in the Caribbean. Ecology. 2005 Aug;86(8):2055–60.
- 469 28. Fabricius KE. Effects of terrestrial runoff on the ecology of corals and coral reefs: review  
470 and synthesis. Marine Pollution Bulletin. 2005;50:125–46.

- 471 29. Speare KE, Duran A, Miller MW, Burkepile DE. Sediment associated with algal turfs  
472 inhibits the settlement of two endangered coral species. *Marine Pollution Bulletin*. 2019  
473 Jul;144:189–95.
- 474 30. Williams ID, Polunin NVC, Hendrick VJ. Limits to grazing by herbivorous fishes and the  
475 impact of low coral cover on macroalgal abundance on a coral reef in Belize. *Marine*  
476 *Ecology Progress Series*. 2001;222:187–96.
- 477 31. Carpenter RC. Mass mortality of *Diadema antillarum*. *Marine Biology*. 1990;104:67–77.
- 478 32. Hay ME, Colburn T, Downing D. Spatial and temporal patterns in herbivory on a Caribbean  
479 fringing-reef - the effects on plant-distribution. *Oecologia*. 1983;58:299–308.
- 480 33. Steneck RS, Mumby PJ, MacDonald C, Rasher DB, Stoyle G. Attenuating effects of  
481 ecosystem management on coral reefs. *Sci Adv*. 2018 May;4(5):eao5493.
- 482 34. Mumby PJ, Harborne AR, Williams J, Kappel CV, Brumbaugh DR, Micheli F, et al.  
483 Trophic cascade facilitates coral recruitment in a marine reserve. *Proc Natl Acad Sci USA*.  
484 2007;104:8362–7.
- 485 35. Paddack MJ, Reynolds JD, Aguilar C, Appeldoorn RS, Beets J, Burkett EW, et al. Recent  
486 Region-wide Declines in Caribbean Reef Fish Abundance. *Current Biology*. 2009  
487 Apr;19(7):590–5.
- 488 36. Williams ID, Polunin NVC. Large-scale associations between macroalgal cover and grazer  
489 biomass on mid-depth reefs in the Caribbean. *Coral Reefs*. 2001;19:358–66.
- 490 37. Hughes T, Szmant AM, Steneck R, Carpenter R, Miller S. Algal blooms on coral reefs:  
491 What are the causes? *Limnology and Oceanography*. 1999;44:1583–6.
- 492 38. Aronson RB, Bruno JF, Precht WF, Glynn PW, Harvell CD, Kaufman L, et al. Causes of  
493 coral reef degradation. *Science*. 2003;302:1502–1502.
- 494 39. Bruno JF, Côté IM, Toth LT. Climate Change, Coral Loss, and the Curious Case of the  
495 Parrotfish Paradigm: Why Don't Marine Protected Areas Improve Reef Resilience?  
496 2018;30.
- 497 40. Pandolfi JM, Jackson JBC, Baron N, Bradbury RH, Guzman HM, Hughes TP, et al. Are  
498 U.S. coral reefs on the slippery slope to slime? *Science*. 2005;307:1725–6.
- 499 41. Russ GR, Questel S-LA, Rizzari JR, Alcala AC. The parrotfish–coral relationship: refuting  
500 the ubiquity of a prevailing paradigm. *Marine Biology*. 2015 Oct;162(10):2029–45.
- 501 42. Mumby PJ, Harborne AR. Marine reserves enhance the recovery of corals on Caribbean  
502 reefs. *PLoS One*. 2010;5(1):e8657.
- 503 43. Hughes TP, Bellwood DR, Folke C, Steneck RS, Wilson J. New paradigms for supporting  
504 the resilience of marine ecosystems. *Trends In Ecology & Evolution*. 2005;20:380–6.

- 505 44. West JM, Salm RV. Resistance and resilience to coral bleaching: Implications for coral reef  
506 conservation and management. *Conservation Biology*. 2003;17:956–67.
- 507 45. Bruno JF, Bates AE, Cacciapaglia C, Pike EP, Amstrup SC, van Hooidek R, et al. Climate  
508 change threatens the world’s marine protected areas. *Nature Clim Change*. 2018  
509 Jun;8(6):499–503.
- 510 46. Cox C, Valdivia A, McField M, Castillo K, Bruno JF. Establishment of marine protected  
511 areas alone does not restore coral reef communities in Belize. *Marine Ecology Progress  
512 Series*. 2017;563(1):65–79.
- 513 47. Bood N D. Recovery and resilience of coral assemblages on managed and unmanaged reefs  
514 in Belize: A long-term study. [Master’s Thesis]. [Mobile, AL]: University of South  
515 Alabama; 2006.
- 516 48. McField MD. Influence of disturbance on coral reef community structure in Belize.  
517 *Proceedings 9’th International Coral Reef Symposium*. 2000;1:63–8.
- 518 49. Stoddart DR. Post-hurricane changes on the British Honduras reefs: re-survey of 1972.  
519 *Proceedings of the Second International Coral Reef Symposium*. 1974;2:473–83.
- 520 50. McClanahan TR, McField M, Huitric M, Bergman K, Sala E, Nystrom M, et al. Responses  
521 of algae corals and fish to the reduction of macroalgae in fished and unfished patch reefs of  
522 Glovers Reef Atoll, Belize. *Coral Reefs*. 2001;19:367–79.
- 523 51. Aronson RB, Edmunds PJ, Precht WF, Swansop DW, Levitan DR. Large-scale, long-term  
524 monitoring of Caribbean coral reefs: simple, quick, inexpensive techniques. *Atoll Research  
525 Bulletin*. 1994;421.
- 526 52. Kohler KE, Gill SM. Coral Point Count with Excel extensions (CPCe): A Visual Basic  
527 program for the determination of coral and substrate coverage using random point count  
528 methodology. *Computers & Geosciences*. 2006 Nov;32(9):1259–69.
- 529 53. Beijbom O, Edmunds PJ, Roelfsema C, Smith J, Kline DI, Neal BP, et al. Towards  
530 Automated Annotation of Benthic Survey Images: Variability of Human Experts and  
531 Operational Modes of Automation. Chen CA, editor. *PLoS ONE*. 2015 Jul  
532 8;10(7):e0130312.
- 533 54. Aronson RB, Precht WF, Toscano MA, Koltes KH. The 1998 bleaching event and its  
534 aftermath on a coral reef in Belize. *Marine Biology*. 2002;141(3):435–47.
- 535 55. WCS and CIESIN. Wildlife Conservation Society - WCS, and Center for International  
536 Earth Science Information Network - CIESIN - Columbia University (2005) Last of the  
537 Wild Project, Version 2, 2005 (LWP-2): Global Human Influence Index (HII) Dataset  
538 (Geographic). Palisades, NY: NASA Socioeconomic Data and Applications Center  
539 (SEDAC). <https://doi.org/10.7927/H4BP00QC>. Accessed 26 November 2018. In 2005.

- 540 56. Mora C. A clear human footprint in the coral reefs of the Caribbean. *Proc R Soc B*. 2008  
541 Apr 7;275(1636):767–73.
- 542 57. Bruno JF, Valdivia A. Coral reef degradation is not correlated with local human population  
543 density. *Sci Rep*. 2016 Sep;6(1):29778.
- 544 58. Knowlton N, Jackson JBC. Shifting baselines, local impacts, and global change on coral  
545 reefs. *PLoS Biology*. 2008;6:e54.
- 546 59. Cinner JE, Maire E, Huchery C, MacNeil MA, Graham NAJ, Mora C, et al. Gravity of  
547 human impacts mediates coral reef conservation gains. *Proc Natl Acad Sci USA*. 2018 Jul  
548 3;115(27):E6116–25.
- 549 60. Selig ER, Casey KS, Bruno JF. New insights into global patterns of ocean temperature  
550 anomalies: implications for coral reef health and management. *Global Ecology and  
551 Biogeography*. 2010;19:397–411.
- 552 61. Selig ER, Harvell CD, Bruno JF, Willis BL, Page CA, Casey KS, et al. Analyzing the  
553 relationship between ocean temperature anomalies and coral disease outbreaks at broad  
554 spatial scales. In: *Coral reefs and climate change: science and management* [Internet].  
555 Washington, DC: American Geophysical Union; 2006. p. 111–28. Available from: [internal-  
556 pdf://Selig et al 2006-3775384832/Selig et al 2006.pdf](#)
- 557 62. Bruno JF, Selig ER, Casey KS, Page CA, Willis BL, Harvell CD, et al. Thermal stress and  
558 coral cover as drivers of coral disease outbreaks. *PLoS Biology*. 2007;5:e124.
- 559 63. Selig ER, Casey KS, Bruno JF. Temperature-driven coral decline: the role of marine  
560 protected areas. *Global Change Biology*. 2012 May;18(5):1561–70.
- 561 64. Maina J, McClanahan TR, Venus V, Ateweberhan M, Madin J. Global gradients of coral  
562 exposure to environmental stresses and implications for local management. *PLoS ONE*.  
563 2011;6(8):14.
- 564 65. Chung Y, Rabe-Hesketh S, Dorie V, Gelman A, Liu J. A nondegenerate penalized  
565 likelihood estimator for variance parameters in multilevel models. *Psychometrika*. 2013 Oct  
566 1;78(4):685–709.
- 567 66. Legendre P, Legendre L. *Numerical Ecology*. Third Edition. Amsterdam, The Netherlands:  
568 Elsevier; 2012.
- 569 67. Huntington BE, Karnauskas M, Lirman D. Corals fail to recover at a Caribbean marine  
570 reserve despite ten years of reserve designation. *Coral Reefs*. 2011 Dec;30(4):1077–85.
- 571 68. McClanahan T, Muthiga N. Change in fish and benthic communities in Belizean patch reefs  
572 in and outside of a marine reserve, across a parrotfish capture ban. *Mar Ecol Prog Ser*. 2020  
573 Jul 9;645:25–40.



- 574 69. Sheppard C. Coral mass mortalities in the Chagos Archipelago over 40 years\_ Regional  
575 species and assemblage extinctions and indications of positive feedbacks. *Marine Pollution*  
576 *Bulletin*. 2020;12.
- 577 70. Brainard RE, Oliver T, McPhaden MJ, Cohen A, Venegas R, Heenan A, et al. Ecological  
578 Impacts of the 2015/16 El Niño in the Central Equatorial Pacific. *Bulletin of the American*  
579 *Meteorological Society*. 2018 Jan 1;99(1):S21–6.
- 580 71. Aronson RB, Macintyre IG, Precht WF, Murdoch TJT, Wapnick CM. The expanding scale  
581 of species turnover events on coral reefs in Belize. *Ecological Monographs*.  
582 2002;72(2):233–49.
- 583 72. Neal BP, Khen A, Treibitz T, Beijbom O, O’Connor G, Coffroth MA, et al. Caribbean  
584 massive corals not recovering from repeated thermal stress events during 2005–2013.  
585 *Ecology and Evolution*. 2017;7(5):1339–53.
- 586 73. Miller, J., Muller, E., Rogers, C., Waara, R., Atkinson, A., Whelan, K. R. T., Patterson, M.,  
587 Witcher B. Coral disease following massive bleaching in 2005 causes 60% decline in coral  
588 cover on reefs in the US Virgin Islands. 2009. p. 925–37.
- 589 74. Villamizar E, Díaz MC, Rützler K, De Nóbrega R. Biodiversity, ecological structure, and  
590 change in the sponge community of different geomorphological zones of the barrier fore  
591 reef at Carrie Bow Cay, Belize. *Marine Ecology*. 2014;35(4):425–35.
- 592 75. McClanahan TR, Muthiga NA. An ecological shift in a remote coral atoll of Belize over 25  
593 years. 1998;(25):122–30.
- 594 76. Rodriguez-Martinez RE, Banaszak AT, McField MD. Assessment of *Acropora palmata* in  
595 the Mesoamerican Reef System. *PLOS ONE*. 2014;9(4):7.
- 596 77. Bruno JF, Sweatman H, Precht WF, Selig ER, Schutte VGW. Assessing evidence of phase  
597 shifts from coral to macroalgal dominance on coral reefs. *Ecology*. 2009;90:1478–84.
- 598 78. Bak RPM, Nieuwland G. Long-term change in coral communities along depth gradients  
599 over leeward reefs in the Netherlands Antilles. *Bulletin of Marine Science*. 1995;56:609–  
600 19.
- 601 79. Toth LT, van Woosik R, Murdoch TJT, Smith SR, Ogden JC, Precht WF, et al. Do no-take  
602 reserves benefit Florida’s corals? 14 years of change and stasis in the Florida Keys National  
603 Marine Sanctuary. *Coral Reefs*. 2014 Sep;33(3):565–77.
- 604 80. Edmunds PJ, Elahi R. The demographics of a 15-year decline in cover of the Caribbean reef  
605 coral *Montastraea annularis*. *Ecological Monographs*. 2007;77:3–18.
- 606 81. Steneck RS, Arnold SN, Boenish R, de León R, Mumby PJ, Rasher DB, et al. Managing  
607 Recovery Resilience in Coral Reefs Against Climate-Induced Bleaching and Hurricanes: A  
608 15 Year Case Study From Bonaire, Dutch Caribbean. *Front Mar Sci*. 2019 Jun 7;6:265.

- 609 82. Hughes TP, Graham NAJ, Jackson JBC, Mumby PJ, Steneck RS. Rising to the challenge of  
610 sustaining coral reef resilience. *Trends in Ecology & Evolution*. 2010;25(11):633–42.
- 611 83. Russ GR. Do marine reserves export adult fish biomass? Evidence from Apo Island,  
612 central Philippines. *Marine Ecology Progress Series*. 1996;132:1–9.
- 613 84. Roberts CM, Bohnsack JA, Gell F, Hawkins JP, Goodridge R. Effects of marine reserves on  
614 adjacent fisheries. *Science*. 2001;294:1920–3.
- 615 85. Lester S, Halpern B. Biological responses in marine no-take reserves versus partially  
616 protected areas. *Mar Ecol Prog Ser*. 2008 Sep 11;367:49–56.
- 617 86. Chirico AAD, McClanahan TR, Eklöf JS. Community- and government-managed marine  
618 protected areas increase fish size, biomass and potential value. Bernardi G, editor. *PLoS*  
619 *ONE*. 2017 Aug 14;12(8):e0182342.
- 620 87. Coelho VR, Manfrino C. Coral community decline at a remote Caribbean island: marine  
621 no-take reserves are not enough. *Aquatic Conservation: Marine and Freshwater*  
622 *Ecosystems*. 2007 Nov;17(7):666–85.
- 623 88. Graham NAJ, McClanahan TR, MacNeil MA, Wilson SK, Polunin NVC, Jennings S, et al.  
624 Climate Warming, Marine Protected Areas and the Ocean-Scale Integrity of Coral Reef  
625 Ecosystems. *PLoS ONE*. 2008;3:e3039.
- 626 89. Darling ES, McClanahan TR, Côté IM. Combined effects of two stressors on Kenyan coral  
627 reefs are additive or antagonistic, not synergistic. *Conservation Letters*. 2010 Apr;3(2):122–  
628 30.
- 629 90. Glynn PW. Coral reef bleaching: ecological perspectives. *Coral Reefs*. 1993;12:1–17.
- 630 91. Brown BE. Coral bleaching: causes and consequences. *Coral Reefs*. 1997;16:S129–38.
- 631 92. Bruno JF, Siddon CE, Witman JD, Colin PL, Toscano MA. El Niño related coral bleaching  
632 in Palau, Western Caroline Islands. *Coral Reefs*. 2001;20:127–36.
- 633 93. Stuart-Smith RD, Brown CJ, Ceccarelli DM, Edgar GJ. Ecosystem restructuring along the  
634 Great Barrier Reef following mass coral bleaching. *Nature*. 2018 Aug;560(7716):92–6.
- 635 94. Jackson JBC, Donovan MK, Cramer KL, Lam VV. Status and Trends of Caribbean Coral  
636 Reefs: 1970-2012. IUCN; 2014.
- 637 95. Aronson RB, Macintyre IG, Precht WF. Event preservation in lagoonal reef systems.  
638 *Geology*. 2005;33(9):717–20.
- 639 96. Ibarra-García EC, Abarca-Arenas LG, Ortiz M, Rodríguez-Zaragoza FA. Impact of  
640 hurricane Dean on Chinchorro Bank coral reef (Western Caribbean): Temporal variation in  
641 the food web structure. *Ecological Indicators*. 2020 Nov;118:106712.

642 97. Aronson RB, Precht WF, Macintyre IG, Toth L. Catastrophe and the Lifespan of Coral  
643 Reefs. *Ecology*. 2012;93(2):110912084141001.

644

645 **TABLES AND FIGURES**

646

647 **Table 1.** Timeline of major disturbances to the Belizean Barrier Reef.

| <b>Year</b> | <b>Disturbance</b>                    | <b>References</b> |
|-------------|---------------------------------------|-------------------|
| 1980s       | Acroporid-specific white-band disease | (54)              |
| 1983        | <i>Diadema</i> -specific disease      | (31)              |
| 1998        | Temperature-induced coral bleaching   | (54,71)           |
| 1998        | Hurricane Mitch                       | (94)              |
| 2001        | Tropical Cyclone Iris                 | (95)              |
| 2005        | Temperature-induced coral bleaching   | (21,72–74)        |
| 2007        | Hurricane Dean                        | (96)              |
| 2009        | Earthquake                            | (97)              |

648

649

650 **Table 2. Estimated regression parameters for benthic groups coverage.** Estimated regression  
 651 parameters, standard errors, F-statistics, p-values, significance levels, and *marginal/conditional*  
 652  $R^2$  from the final Bayesian generalized linear mixed models for each benthic group. Significance  
 653 levels (Sig.) are: \*\*\* < 0.001; \*\* < 0.01, \* < 0.05.

| <b>Benthic group/Terms</b>                              | <b>Estimates</b>    | <b>Std. error</b> | <b>Statistic</b> | <b>p-value</b> | <b>Sig.</b> |
|---------------------------------------------------------|---------------------|-------------------|------------------|----------------|-------------|
| <b>Hard Coral</b>                                       |                     |                   |                  |                |             |
| (Intercept)                                             | -1.877              | 0.126             | -14.849          | < 0.001        | ***         |
| Year                                                    | -0.492              | 0.103             | -4.773           | < 0.001        | ***         |
| Fishing vs. No Fishing                                  | 0.127               | 0.225             | 0.567            | 0.570          |             |
| HII at 50 km                                            | 0.324               | 0.217             | 1.492            | 0.136          |             |
| TSA Freq                                                | -0.383              | 0.117             | -3.278           | 0.001          | **          |
| <i>Marginal R<sup>2</sup>/Conditional R<sup>2</sup></i> | <i>0.347/ 0.665</i> |                   |                  |                |             |
| <b>Macroalgae</b>                                       |                     |                   |                  |                |             |
| (Intercept)                                             | -0.929              | 0.148             | -6.274           | < 0.001        | ***         |
| Year                                                    | 0.925               | 0.108             | 8.576            | < 0.001        | ***         |
| Fishing vs. No Fishing                                  | 0.138               | 0.265             | 0.522            | 0.602          |             |
| HII at 50 km                                            | 0.307               | 0.256             | 1.202            | 0.229          |             |
| TSA Freq                                                | 0.225               | 0.123             | 1.829            | 0.067          |             |
| <i>Marginal R<sup>2</sup>/Conditional R<sup>2</sup></i> | <i>0.480/0.775</i>  |                   |                  |                |             |
| <b>CTB</b>                                              |                     |                   |                  |                |             |
| (Intercept)                                             | -0.998              | 0.149             | -6.695           | < 0.001        | ***         |
| Year                                                    | -1.622              | 0.194             | -8.360           | < 0.001        | ***         |
| Fishing vs. No Fishing                                  | 0.212               | 0.248             | 0.853            | 0.394          |             |
| HII at 50 km                                            | -0.243              | 0.243             | -0.999           | 0.318          |             |
| TSA Freq                                                | 0.255               | 0.205             | 1.245            | 0.213          |             |
| <i>Marginal R<sup>2</sup>/Conditional R<sup>2</sup></i> | <i>0.613/0.652</i>  |                   |                  |                |             |
| <b>Gorgonian</b>                                        |                     |                   |                  |                |             |
| (Intercept)                                             | -2.152              | 0.097             | -22.092          | < 0.001        | ***         |
| Year                                                    | 0.407               | 0.111             | 3.658            | < 0.001        | ***         |
| Fishing vs. No Fishing                                  | -0.373              | 0.166             | -2.240           | 0.025          | *           |
| HII at 50 km                                            | -0.450              | 0.162             | -2.777           | 0.005          | **          |
| TSA Freq                                                | -0.352              | 0.121             | -2.921           | 0.003          | **          |
| <i>Marginal R<sup>2</sup>/Conditional R<sup>2</sup></i> | <i>0.430/0.550</i>  |                   |                  |                |             |
| <b>Sponge</b>                                           |                     |                   |                  |                |             |
| (Intercept)                                             | -3.443              | 0.159             | -21.724          | < 0.001        | ***         |
| Year                                                    | -0.209              | 0.172             | -1.215           | 0.224          |             |
| Fishing vs. No Fishing                                  | 0.070               | 0.273             | 0.258            | 0.797          |             |
| HII at 50 km                                            | -0.125              | 0.265             | -0.469           | 0.639          |             |
| TSA Freq                                                | -0.299              | 0.188             | -1.591           | 0.112          |             |
| <i>Marginal R<sup>2</sup>/Conditional R<sup>2</sup></i> | <i>0.099/0.329</i>  |                   |                  |                |             |

654

655 **Table 3.** Results of the Permutational Multivariate Analysis of Variance (PERMANOVA) using  
656 the Bray-Curtis dissimilarity index to determine the effects of covariates in changes of benthic  
657 community composition cover. df: degrees of freedom, SS: sum of squares. Significance level  
658 (Sig.): \*\*\* < 0.001

| <b>Term</b>   | <b>df</b> | <b>SS</b> | <b>R<sup>2</sup></b> | <b>F</b> | <b>Pr(&gt;F)</b> | <b>Sig.</b> |
|---------------|-----------|-----------|----------------------|----------|------------------|-------------|
| Year          | 1         | 2.347     | 0.501                | 45.761   | <0.001           | ***         |
| HII 50km      | 1         | 0.137     | 0.029                | 2.679    | 0.062            |             |
| TSA Freq      | 1         | 0.072     | 0.015                | 1.401    | 0.218            |             |
| Fishing level | 1         | 0.075     | 0.016                | 1.465    | 0.200            |             |
| Residual      | 40        | 2.051     | 0.438                |          |                  |             |
| Total         | 44        | 4.683     | 1.000                |          |                  |             |

659

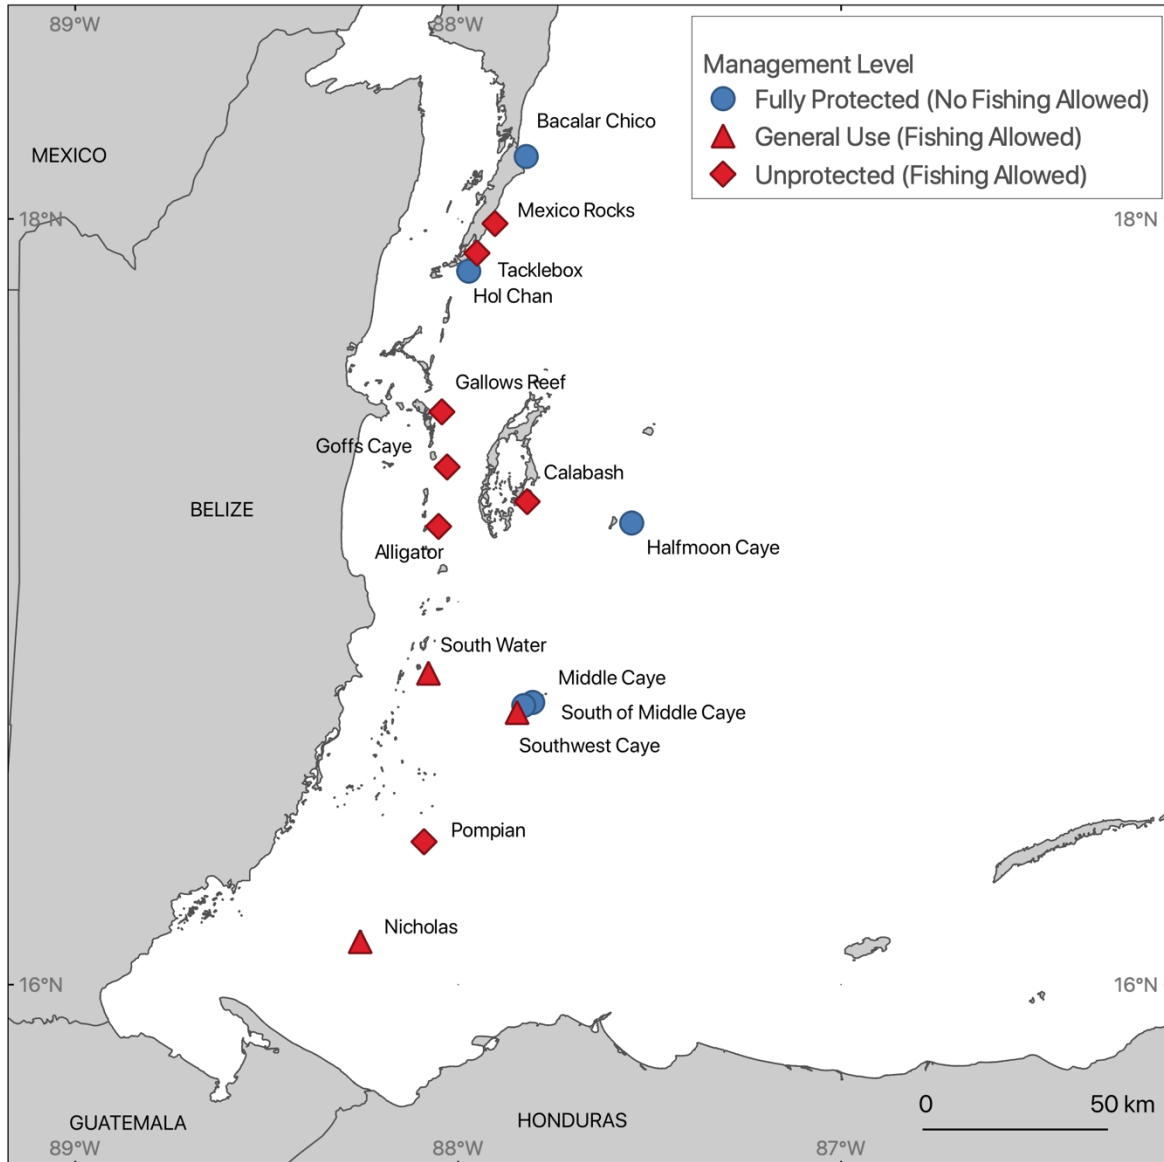

660

661 **Figure 1. Study sites along the Belizean Barrier Reef.** Sites are categorized by management  
662 and fishing level. Fishing is allowed in general use and unprotected sites (red), whereas fishing is  
663 prohibited in fully protected sites (blue).

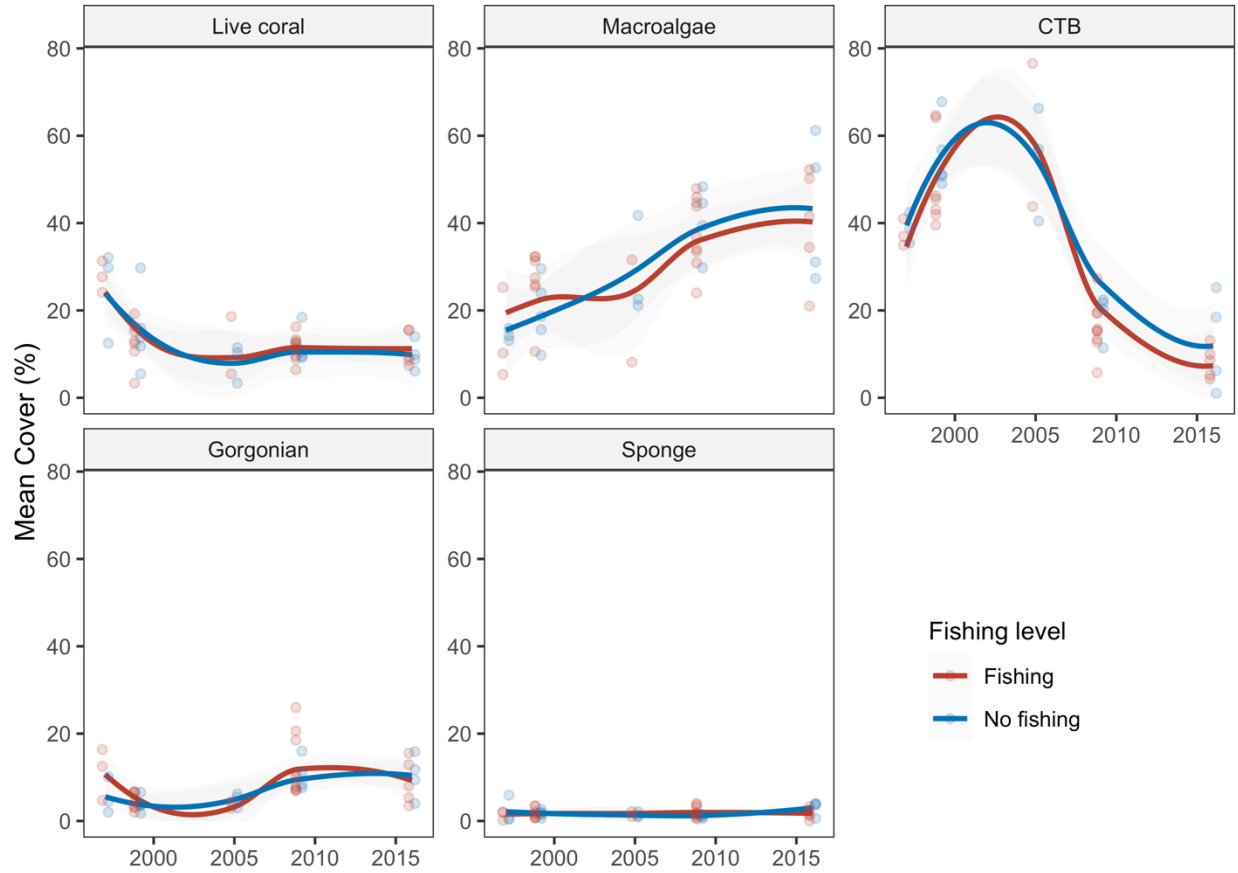

664

665 **Figure 2. Percent cover of five benthic categories over time grouped by fishing level. Points**

666 are site means, lines are loess smoothed curves with a span of 1, shading indicates the 95%

667 confidence intervals of the loess fits.



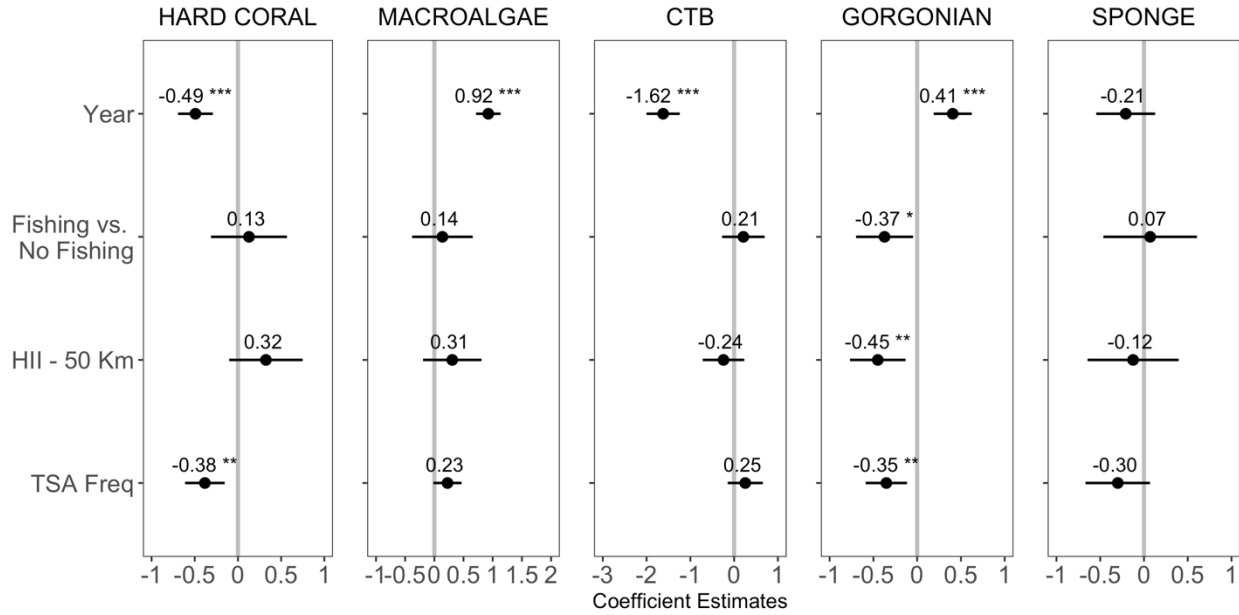

668

669 **Figure 3. Effect-sizes ( $\pm$  95% CI) of covariates from the Bayesian generalized linear mixed-**  
670 **effect model on the five benthic groups.** Values above points are effect sizes. CIs crossing the  
671 vertical grey line represents a non-significant effect. Significance levels: \*\*\* = 0.001; \*\* = 0.01,  
672 \* = 0.05.

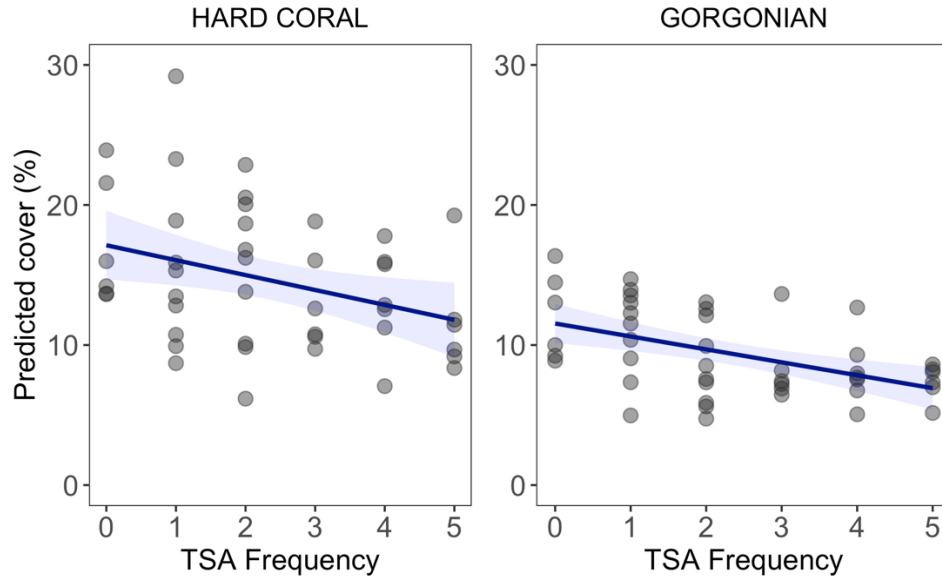

673

674 **Figure 4. Predicted effect of TSA frequency on hard-coral and gorgonian cover.** Points are  
675 predicted benthic group cover (back calculated from logit transformation) from Bayesian  
676 generalized liner mixed model accounting for time, fishing level, and human influence index.  
677 Blue lines are the fitted curves of the models and shaded areas are the 95 % CIs.

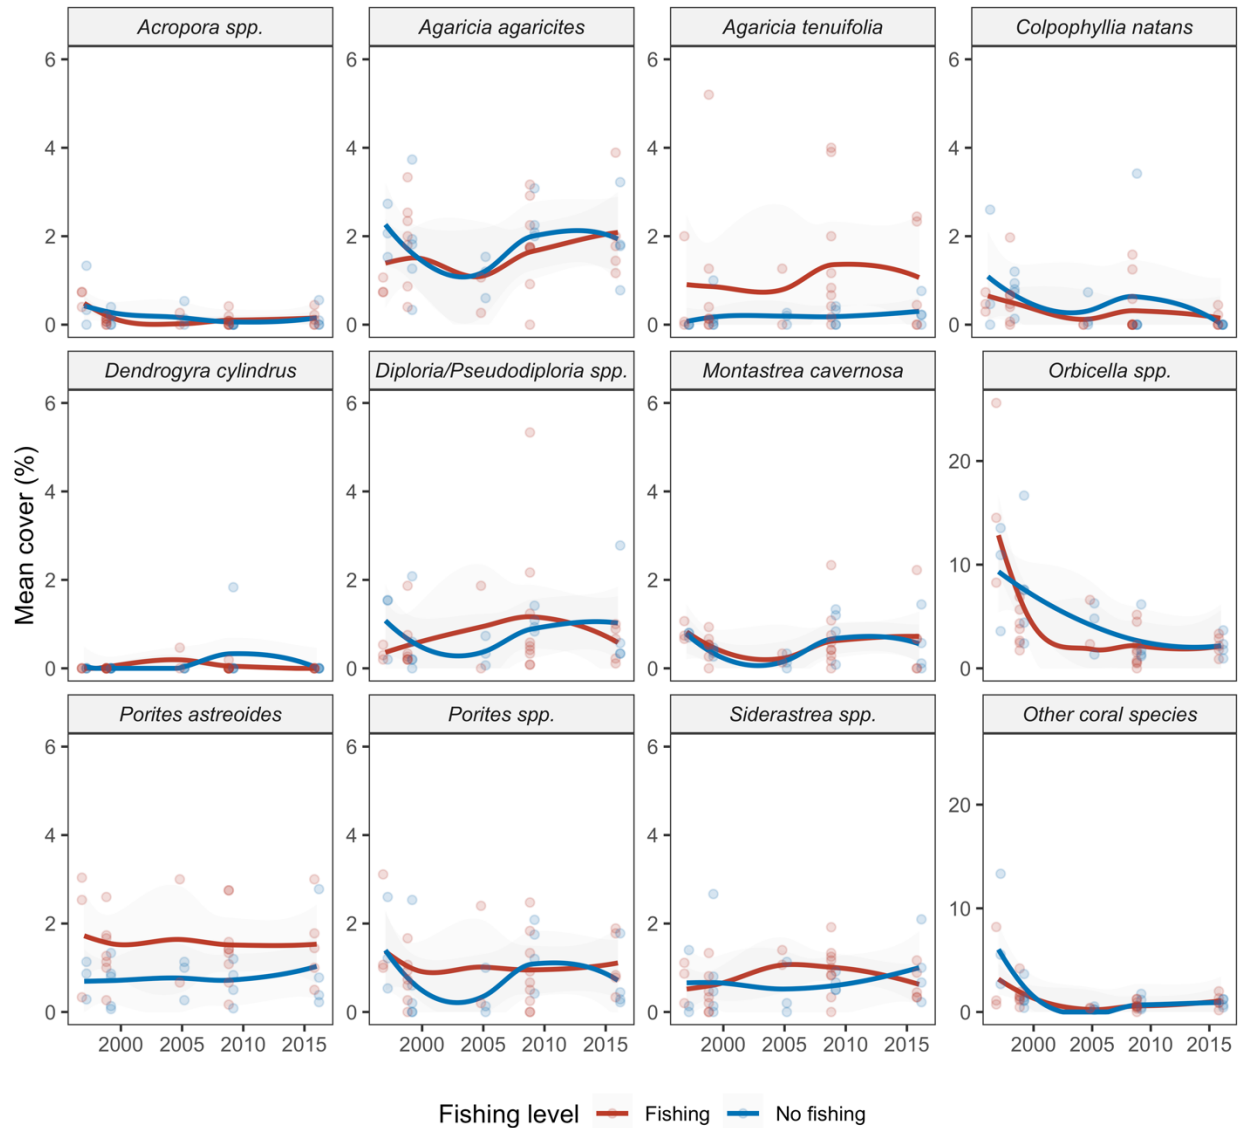

678

679 **Figure 5. Mean percent cover of twelve taxonomic categories of hard corals, grouped by**  
680 **fishing level.** Fishing occurs in red sites and is prohibited in blue sites. Points are site means for  
681 each surveyed year, lines are a loess smoothed curves with a span of 1, and shading indicates the  
682 95% confidence intervals of the loess fits.

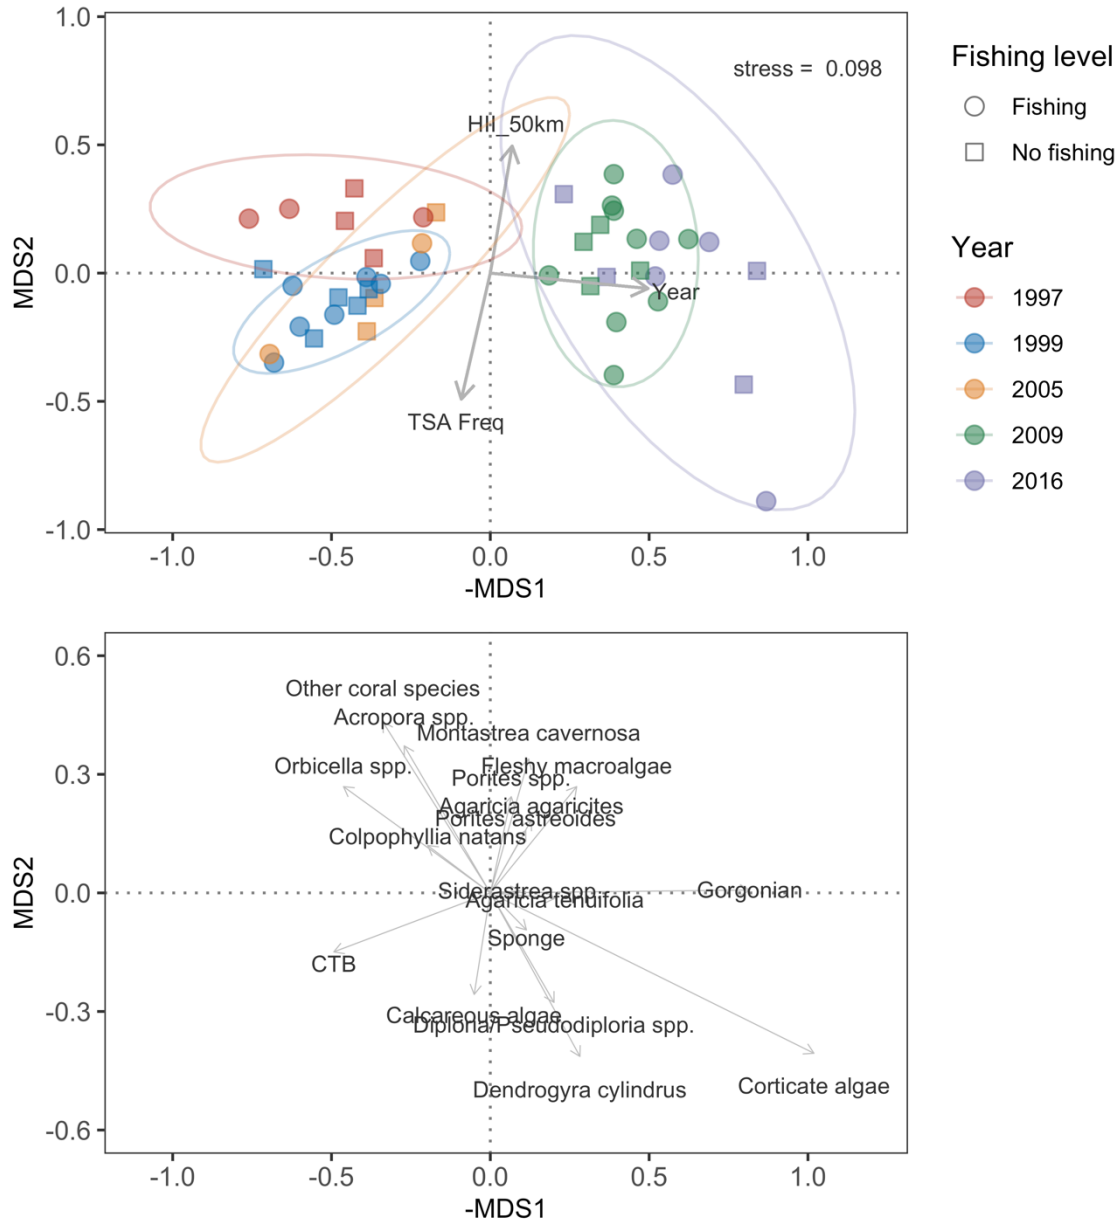

683

684 **Figure 6. Non-metric multidimensional scaling (MDS) plot depicting taxon-level cover data**

685 **colored by year.** In the top panel, points represent individual sites, circles are fishing sites, and

686 squares are no-fishing sites. Arrows represent the fitted loadings scores for Year, TSA\_Freq, and

687 HII\_50km. In the bottom panel, the arrows and labels represent specific benthic categories

688 loadings. The Bray–Curtis dissimilarity matrix was used and the stress value was 0.098.
